# Supplementary material for: The safety and efficacy of irreversible electroporation for the ablation of prostate cancer: a multicentre prospective human in vivo pilot study protocol
Source: PubMed Central journal article supplement — BMJ Open. 2014 Oct 29;4(10):e006382. doi: 10.1136/bmjopen-2014-006382 (PMC4216863; doi:10.1136/bmjopen-2014-006382), 2014-10-29
Supplement: bmjopen-2014-006382.reviewer_comments.pdf [file bmjopen-2014-006382.reviewer_comments.pdf]

## PEER REVIEW HISTORY

BMJ Open publishes all reviews undertaken for accepted manuscripts. Reviewers are asked to complete a checklist review form (<http://bmjopen.bmj.com/site/about/resources/checklist.pdf>) and are provided with free text boxes to elaborate on their assessment. These free text comments are reproduced below.

## ARTICLE DETAILS

|                            |                                                                                                                                                                                                                                                                |
|----------------------------|----------------------------------------------------------------------------------------------------------------------------------------------------------------------------------------------------------------------------------------------------------------|
| <b>TITLE (PROVISIONAL)</b> | The Safety and Efficacy of Irreversible Electroporation for the Ablation of Prostate Cancer: A Multicentre Prospective Human In-Vivo Pilot Study Protocol                                                                                                      |
| <b>AUTHORS</b>             | van den Bos, Willemien; de Bruin, Daniel; Muller, Berrend; Varkarakis, Ionannis; Karagiannis, Andreas; Zondervan, Patricia; Laguna Pes, Pilar; Veelo, Denise; Savci-Heijink, Dilara; Engelbrecht, Marc; Wijkstra, Hessel; de Reijke, Theo; de la Rosette, Jean |

This article was not externally reviewed at BMJ Open. Protocols that have been independently assessed prior to submission to BMJ Open are usually fast-tracked to publication on the grounds that further substantial changes will not be possible. This independent assessment will usually be external, independent review for both a substantial grant award from a non-commercial or government funder and ethics approval.
